# Supplementary material for: Significance of PD-L1 in Metastatic Urothelial Carcinoma Treated With Immune Checkpoint Inhibitors: A Systematic Review and Meta-Analysis
Source: PubMed Central journal article supplement (PMC10918499; doi:10.1001/jamanetworkopen.2024.1215), 2024-03-06
Supplement: jamanetwopen-e241215-s002.pdf [file jamanetwopen-e241215-s002.pdf]

\*First name, last name, and suffix (if applicable) are required and will appear in PubMed.

| <b>*Group Name(s): MeetUro Group</b>     |                   |                              |                  |             |                                          |                                                         |                                                                                           |
|------------------------------------------|-------------------|------------------------------|------------------|-------------|------------------------------------------|---------------------------------------------------------|-------------------------------------------------------------------------------------------|
| <b>*First Name and Middle Initial(s)</b> | <b>*Last Name</b> | <b>*Suffix (eg, Jr, III)</b> | Academic Degrees | Institution | Location (city, state/province, country) | Role or Contribution, eg, chair, principal investigator | Group (if more than 1 Group listed in the byline and/or Subgroup (eg, Steering Committee) |
| Caterina                                 | Accettura         | /                            |                  |             |                                          |                                                         |                                                                                           |
| Michele                                  | Aieta             |                              |                  |             |                                          |                                                         |                                                                                           |
| Martina                                  | Alberti           |                              |                  |             |                                          |                                                         |                                                                                           |
| Marta                                    | Aliprandi         |                              |                  |             |                                          |                                                         |                                                                                           |
| Amelia                                   | Altavilla         |                              |                  |             |                                          |                                                         |                                                                                           |
| Lorenzo                                  | Antonuzzo         |                              |                  |             |                                          |                                                         |                                                                                           |
| Adele                                    | Artemi            |                              |                  |             |                                          |                                                         |                                                                                           |
| Dario                                    | Arundine          |                              |                  |             |                                          |                                                         |                                                                                           |
| Serena                                   | Astore            |                              |                  |             |                                          |                                                         |                                                                                           |
| Laura                                    | Attademo          |                              |                  |             |                                          |                                                         |                                                                                           |
| Francesco                                | Atzori            |                              |                  |             |                                          |                                                         |                                                                                           |
| Gaetano                                  | Aurilio           |                              |                  |             |                                          |                                                         |                                                                                           |
| Amalia                                   | Azzariti          |                              |                  |             |                                          |                                                         |                                                                                           |
| Giulia                                   | Baciarello        |                              |                  |             |                                          |                                                         |                                                                                           |
| Susanne                                  | Baier             |                              |                  |             |                                          |                                                         |                                                                                           |
| Valentina                                | Baldazzi          |                              |                  |             |                                          |                                                         |                                                                                           |
| Giuseppe L                               | Banna             |                              |                  |             |                                          |                                                         |                                                                                           |
| Carmen                                   | Barile            |                              |                  |             |                                          |                                                         |                                                                                           |
| Salvina                                  | Barra             |                              |                  |             |                                          |                                                         |                                                                                           |
| Chiara                                   | Barraco           |                              |                  |             |                                          |                                                         |                                                                                           |
| Debora                                   | Basile            |                              |                  |             |                                          |                                                         |                                                                                           |
| Maria                                    | Bassanelli        |                              |                  |             |                                          |                                                         |                                                                                           |
| Umberto                                  | Basso             |                              |                  |             |                                          |                                                         |                                                                                           |
| Matteo                                   | Bauckneht         |                              |                  |             |                                          |                                                         |                                                                                           |
| Alessandra                               | Bearz             |                              |                  |             |                                          |                                                         |                                                                                           |
| Salvatore R                              | Bellia            |                              |                  |             |                                          |                                                         |                                                                                           |
| Benedetta                                | Benedetti         |                              |                  |             |                                          |                                                         |                                                                                           |
| Rossana                                  | Berardi           |                              |                  |             |                                          |                                                         |                                                                                           |
| Marco                                    | Bergamini         |                              |                  |             |                                          |                                                         |                                                                                           |

## Supplemental Online Content: Nonauthor Collaborators

\*First name, last name, and suffix (if applicable) are required and will appear in PubMed.

| *First Name and Middle Initial(s) | *Last Name  | *Suffix (eg, Jr, III) | Academic Degrees | Institution | Location (city, state/province, country) | Role or Contribution, eg, chair, principal investigator | Group (if more than 1 Group listed in the byline) and/or Subgroup (eg, Steering Committee) |
|-----------------------------------|-------------|-----------------------|------------------|-------------|------------------------------------------|---------------------------------------------------------|--------------------------------------------------------------------------------------------|
| Melissa                           | Bersanelli  |                       |                  |             |                                          |                                                         |                                                                                            |
| Maria                             | Bertoni     |                       |                  |             |                                          |                                                         |                                                                                            |
| Emanuela                          | Bianchi     |                       |                  |             |                                          |                                                         |                                                                                            |
| Claudia                           | Biasini     |                       |                  |             |                                          |                                                         |                                                                                            |
| Livia                             | Bidin       |                       |                  |             |                                          |                                                         |                                                                                            |
| Davide                            | Bimbatti    |                       |                  |             |                                          |                                                         |                                                                                            |
| Sara                              | Bleve       |                       |                  |             |                                          |                                                         |                                                                                            |
| Francesco                         | Boccardo    |                       |                  |             |                                          |                                                         |                                                                                            |
| Elena                             | Bolzacchini |                       |                  |             |                                          |                                                         |                                                                                            |
| Adele                             | Bonato      |                       |                  |             |                                          |                                                         |                                                                                            |
| Lucia                             | Bonomi      |                       |                  |             |                                          |                                                         |                                                                                            |
| Sebastiano                        | Bordonaro   |                       |                  |             |                                          |                                                         |                                                                                            |
| Marco                             | Borghesi    |                       |                  |             |                                          |                                                         |                                                                                            |
| Roberto                           | Bortolus    |                       |                  |             |                                          |                                                         |                                                                                            |
| Lucia                             | Bortot      |                       |                  |             |                                          |                                                         |                                                                                            |
| Davide                            | Bosso       |                       |                  |             |                                          |                                                         |                                                                                            |
| Achille                           | Bottiglieri |                       |                  |             |                                          |                                                         |                                                                                            |
| Giovanni                          | Bozza       |                       |                  |             |                                          |                                                         |                                                                                            |
| Marco                             | Bregni      |                       |                  |             |                                          |                                                         |                                                                                            |
| Nicole                            | Brighi      |                       |                  |             |                                          |                                                         |                                                                                            |
| Enrico                            | Bronte      |                       |                  |             |                                          |                                                         |                                                                                            |
| Alessio                           | Bruni       |                       |                  |             |                                          |                                                         |                                                                                            |
| Michele                           | Bruno       |                       |                  |             |                                          |                                                         |                                                                                            |
| Martina                           | Buffoni     |                       |                  |             |                                          |                                                         |                                                                                            |
| Luciana                           | Buonerba    |                       |                  |             |                                          |                                                         |                                                                                            |
| Carlo                             | Buonerba    |                       |                  |             |                                          |                                                         |                                                                                            |
| Sebastiano                        | Buti        |                       |                  |             |                                          |                                                         |                                                                                            |
| Consuelo                          | Buttigliero |                       |                  |             |                                          |                                                         |                                                                                            |
| Jessica                           | Cadau       |                       |                  |             |                                          |                                                         |                                                                                            |
| Orazio                            | Caffo       |                       |                  |             |                                          |                                                         |                                                                                            |
| Fabio                             | Calabrò     |                       |                  |             |                                          |                                                         |                                                                                            |

## Supplemental Online Content: Nonauthor Collaborators

\*First name, last name, and suffix (if applicable) are required and will appear in PubMed.

| *First Name and Middle Initial(s) | *Last Name  | *Suffix (eg, Jr, III) | Academic Degrees | Institution | Location (city, state/province, country) | Role or Contribution, eg, chair, principal investigator | Group (if more than 1 Group listed in the byline) and/or Subgroup (eg, Steering Committee) |
|-----------------------------------|-------------|-----------------------|------------------|-------------|------------------------------------------|---------------------------------------------------------|--------------------------------------------------------------------------------------------|
| Nicola                            | Calvani     |                       |                  |             |                                          |                                                         |                                                                                            |
| Davide                            | Campobasso  |                       |                  |             |                                          |                                                         |                                                                                            |
| Samanta                           | Capacci     |                       |                  |             |                                          |                                                         |                                                                                            |
| Umberto                           | Capitano    |                       |                  |             |                                          |                                                         |                                                                                            |
| Salvatore R                       | Caponnetto  |                       |                  |             |                                          |                                                         |                                                                                            |
| Claudia                           | Carella     |                       |                  |             |                                          |                                                         |                                                                                            |
| Paolo                             | Carlini     |                       |                  |             |                                          |                                                         |                                                                                            |
| Francesco                         | Carrozza    |                       |                  |             |                                          |                                                         |                                                                                            |
| Giacomo                           | Carteni     |                       |                  |             |                                          |                                                         |                                                                                            |
| Davide                            | Caruso      |                       |                  |             |                                          |                                                         |                                                                                            |
| Chiara                            | Casadei     |                       |                  |             |                                          |                                                         |                                                                                            |
| Fabio                             | Catalano    |                       |                  |             |                                          |                                                         |                                                                                            |
| Martina                           | Catalano    |                       |                  |             |                                          |                                                         |                                                                                            |
| Carlo                             | Cattrini    |                       |                  |             |                                          |                                                         |                                                                                            |
| Nicolò                            | Cavasin     |                       |                  |             |                                          |                                                         |                                                                                            |
| Alessia                           | Cavo        |                       |                  |             |                                          |                                                         |                                                                                            |
| Luigi G                           | Cecchi      |                       |                  |             |                                          |                                                         |                                                                                            |
| Sabrina C                         | Cecere      |                       |                  |             |                                          |                                                         |                                                                                            |
| Linda                             | Cerbone     |                       |                  |             |                                          |                                                         |                                                                                            |
| Giovanni L                        | Ceresoli    |                       |                  |             |                                          |                                                         |                                                                                            |
| Rita                              | Chiari      |                       |                  |             |                                          |                                                         |                                                                                            |
| Silvia                            | Chiellino   |                       |                  |             |                                          |                                                         |                                                                                            |
| Vincenzo E                        | Chiuri      |                       |                  |             |                                          |                                                         |                                                                                            |
| Stefano                           | Ciccarelli  |                       |                  |             |                                          |                                                         |                                                                                            |
| Giuseppe L                        | Cicero      |                       |                  |             |                                          |                                                         |                                                                                            |
| Marika                            | Cinausero   |                       |                  |             |                                          |                                                         |                                                                                            |
| Fabrizio                          | Citarella   |                       |                  |             |                                          |                                                         |                                                                                            |
| Melanie                           | Claps       |                       |                  |             |                                          |                                                         |                                                                                            |
| Emilia                            | Cocorocchio |                       |                  |             |                                          |                                                         |                                                                                            |
| Vincenza                          | Conteduca   |                       |                  |             |                                          |                                                         |                                                                                            |
| Elisabetta                        | Coppola     |                       |                  |             |                                          |                                                         |                                                                                            |

## Supplemental Online Content: Nonauthor Collaborators

\*First name, last name, and suffix (if applicable) are required and will appear in PubMed.

| *First Name and Middle Initial(s) | *Last Name   | *Suffix (eg, Jr, III) | Academic Degrees | Institution | Location (city, state/province, country) | Role or Contribution, eg, chair, principal investigator | Group (if more than 1 Group listed in the byline) and/or Subgroup (eg, Steering Committee) |
|-----------------------------------|--------------|-----------------------|------------------|-------------|------------------------------------------|---------------------------------------------------------|--------------------------------------------------------------------------------------------|
| Nadia                             | Cordua       |                       |                  |             |                                          |                                                         |                                                                                            |
| Maria                             | Cossu Rocca  |                       |                  |             |                                          |                                                         |                                                                                            |
| Giulia                            | Courthod     |                       |                  |             |                                          |                                                         |                                                                                            |
| Malvina                           | Cremante     |                       |                  |             |                                          |                                                         |                                                                                            |
| Daniela                           | Cullurà      |                       |                  |             |                                          |                                                         |                                                                                            |
| Maria C                           | Cursano      |                       |                  |             |                                          |                                                         |                                                                                            |
| Nicola                            | D'Ostilio    |                       |                  |             |                                          |                                                         |                                                                                            |
| Alberto                           | Dalla Volta  |                       |                  |             |                                          |                                                         |                                                                                            |
| Alessandra                        | Damassi      |                       |                  |             |                                          |                                                         |                                                                                            |
| Bruno                             | Daniele      |                       |                  |             |                                          |                                                         |                                                                                            |
| Ugo FF                            | De Giorgi    |                       |                  |             |                                          |                                                         |                                                                                            |
| Mariagrazia                       | De Lisa      |                       |                  |             |                                          |                                                         |                                                                                            |
| Delia                             | De Lisi      |                       |                  |             |                                          |                                                         |                                                                                            |
| Simona                            | De Summa     |                       |                  |             |                                          |                                                         |                                                                                            |
| Rocco                             | De Vivo      |                       |                  |             |                                          |                                                         |                                                                                            |
| Silvia A                          | Debonis      |                       |                  |             |                                          |                                                         |                                                                                            |
| Marzia                            | Del Re       |                       |                  |             |                                          |                                                         |                                                                                            |
| Ilaria                            | Depetris     |                       |                  |             |                                          |                                                         |                                                                                            |
| Mattia A                          | Di Civita    |                       |                  |             |                                          |                                                         |                                                                                            |
| Fabrizio                          | Di Costanzo  |                       |                  |             |                                          |                                                         |                                                                                            |
| Simona                            | Di Francesco |                       |                  |             |                                          |                                                         |                                                                                            |
| Stefania                          | Di Girolamo  |                       |                  |             |                                          |                                                         |                                                                                            |
| Giuseppe                          | Di Lorenzo   |                       |                  |             |                                          |                                                         |                                                                                            |
| Massimo                           | Di Maio      |                       |                  |             |                                          |                                                         |                                                                                            |
| Marilena                          | Di Napoli    |                       |                  |             |                                          |                                                         |                                                                                            |
| Roberta                           | Di Rocco     |                       |                  |             |                                          |                                                         |                                                                                            |
| Piergiorgio                       | Di Tullio    |                       |                  |             |                                          |                                                         |                                                                                            |
| Angelo                            | Dinota       |                       |                  |             |                                          |                                                         |                                                                                            |
| Michele                           | Dionese      |                       |                  |             |                                          |                                                         |                                                                                            |
| Donatella                         | Donati       |                       |                  |             |                                          |                                                         |                                                                                            |
| Laura                             | Doni         |                       |                  |             |                                          |                                                         |                                                                                            |

## Supplemental Online Content: Nonauthor Collaborators

\*First name, last name, and suffix (if applicable) are required and will appear in PubMed.

| *First Name and Middle Initial(s) | *Last Name  | *Suffix (eg, Jr, III) | Academic Degrees | Institution | Location (city, state/province, country) | Role or Contribution, eg, chair, principal investigator | Group (if more than 1 Group listed in the byline) and/or Subgroup (eg, Steering Committee) |
|-----------------------------------|-------------|-----------------------|------------------|-------------|------------------------------------------|---------------------------------------------------------|--------------------------------------------------------------------------------------------|
| Antonio                           | Doronzo     |                       |                  |             |                                          |                                                         |                                                                                            |
| Arianna                           | Dri         |                       |                  |             |                                          |                                                         |                                                                                            |
| Paola                             | Ermacora    |                       |                  |             |                                          |                                                         |                                                                                            |
| Laura                             | Evangelista |                       |                  |             |                                          |                                                         |                                                                                            |
| Martina                           | Fanelli     |                       |                  |             |                                          |                                                         |                                                                                            |
| Elena                             | Farè        |                       |                  |             |                                          |                                                         |                                                                                            |
| Azzurra                           | Farnesi     |                       |                  |             |                                          |                                                         |                                                                                            |
| Alberto                           | Farolfi     |                       |                  |             |                                          |                                                         |                                                                                            |
| Antonio                           | Febbraro    |                       |                  |             |                                          |                                                         |                                                                                            |
| Palma                             | Fedele      |                       |                  |             |                                          |                                                         |                                                                                            |
| Piera                             | Federico    |                       |                  |             |                                          |                                                         |                                                                                            |
| Gilberto                          | Filaci      |                       |                  |             |                                          |                                                         |                                                                                            |
| Roberto                           | Filippi     |                       |                  |             |                                          |                                                         |                                                                                            |
| Alessia                           | Filograna   |                       |                  |             |                                          |                                                         |                                                                                            |
| Simone                            | Foderaro    |                       |                  |             |                                          |                                                         |                                                                                            |
| Antonella                         | Fontana     |                       |                  |             |                                          |                                                         |                                                                                            |
| Luigi                             | Formisano   |                       |                  |             |                                          |                                                         |                                                                                            |
| Giuseppe                          | Fornarini   |                       |                  |             |                                          |                                                         |                                                                                            |
| Edoardo                           | Francini    |                       |                  |             |                                          |                                                         |                                                                                            |
| Ciro                              | Franzese    |                       |                  |             |                                          |                                                         |                                                                                            |
| Lucia                             | Fratino     |                       |                  |             |                                          |                                                         |                                                                                            |
| Daniele                           | Galanti     |                       |                  |             |                                          |                                                         |                                                                                            |
| Luca                              | Galli       |                       |                  |             |                                          |                                                         |                                                                                            |
| Teresa                            | Gamba       |                       |                  |             |                                          |                                                         |                                                                                            |
| Elisabetta                        | Gambale     |                       |                  |             |                                          |                                                         |                                                                                            |
| Silvio K                          | Garattini   |                       |                  |             |                                          |                                                         |                                                                                            |
| Elisabetta                        | Garibaldi   |                       |                  |             |                                          |                                                         |                                                                                            |
| Donatello                         | Gasparro    |                       |                  |             |                                          |                                                         |                                                                                            |
| Anna L                            | Gentile     |                       |                  |             |                                          |                                                         |                                                                                            |
| Domenico                          | Germano     |                       |                  |             |                                          |                                                         |                                                                                            |
| Angela                            | Gernone     |                       |                  |             |                                          |                                                         |                                                                                            |

## Supplemental Online Content: Nonauthor Collaborators

\*First name, last name, and suffix (if applicable) are required and will appear in PubMed.

| *First Name and Middle Initial(s) | *Last Name  | *Suffix (eg, Jr, III) | Academic Degrees | Institution | Location (city, state/province, country) | Role or Contribution, eg, chair, principal investigator | Group (if more than 1 Group listed in the byline) and/or Subgroup (eg, Steering Committee) |
|-----------------------------------|-------------|-----------------------|------------------|-------------|------------------------------------------|---------------------------------------------------------|--------------------------------------------------------------------------------------------|
| Laura                             | Ghilardi    |                       |                  |             |                                          |                                                         |                                                                                            |
| Patrizia                          | Giannatempo |                       |                  |             |                                          |                                                         |                                                                                            |
| Caterina                          | Gianni      |                       |                  |             |                                          |                                                         |                                                                                            |
| Emilia                            | Gianotti    |                       |                  |             |                                          |                                                         |                                                                                            |
| Roberta                           | Giorgione   |                       |                  |             |                                          |                                                         |                                                                                            |
| Giulia C                          | Giudice     |                       |                  |             |                                          |                                                         |                                                                                            |
| Emilio F                          | Giunta      |                       |                  |             |                                          |                                                         |                                                                                            |
| Cesare                            | Gridelli    |                       |                  |             |                                          |                                                         |                                                                                            |
| Francesco                         | Grillone    |                       |                  |             |                                          |                                                         |                                                                                            |
| Valentina                         | Guadalupi   |                       |                  |             |                                          |                                                         |                                                                                            |
| Simona                            | Gualtieri   |                       |                  |             |                                          |                                                         |                                                                                            |
| Alessia S                         | Guarneri    |                       |                  |             |                                          |                                                         |                                                                                            |
| Priscilla                         | Guglielmo   |                       |                  |             |                                          |                                                         |                                                                                            |
| Alketa                            | Hamzaj      |                       |                  |             |                                          |                                                         |                                                                                            |
| Afete                             | Hamzaj      |                       |                  |             |                                          |                                                         |                                                                                            |
| Maria L                           | Iaia        |                       |                  |             |                                          |                                                         |                                                                                            |
| Debora                            | Ierinò      |                       |                  |             |                                          |                                                         |                                                                                            |
| Lorena                            | Incorvaia   |                       |                  |             |                                          |                                                         |                                                                                            |
| Concetta                          | Ingenito    |                       |                  |             |                                          |                                                         |                                                                                            |
| Nicola                            | Inzerilli   |                       |                  |             |                                          |                                                         |                                                                                            |
| Salim                             | Jubran      |                       |                  |             |                                          |                                                         |                                                                                            |
| Stefania                          | Kinspergher |                       |                  |             |                                          |                                                         |                                                                                            |
| Antonella                         | La Camera   |                       |                  |             |                                          |                                                         |                                                                                            |
| Francesca                         | La Russa    |                       |                  |             |                                          |                                                         |                                                                                            |
| Eleonora                          | Lai         |                       |                  |             |                                          |                                                         |                                                                                            |
| Federica                          | Lancia      |                       |                  |             |                                          |                                                         |                                                                                            |
| Matteo                            | Landriscina |                       |                  |             |                                          |                                                         |                                                                                            |
| Francesco                         | Lanfranchi  |                       |                  |             |                                          |                                                         |                                                                                            |
| Fiorenza                          | Latteri     |                       |                  |             |                                          |                                                         |                                                                                            |
| Edoardo                           | Lenci       |                       |                  |             |                                          |                                                         |                                                                                            |
| Helga MA                          | Lipari      |                       |                  |             |                                          |                                                         |                                                                                            |

## Supplemental Online Content: Nonauthor Collaborators

\*First name, last name, and suffix (if applicable) are required and will appear in PubMed.

| *First Name and Middle Initial(s) | *Last Name   | *Suffix (eg, Jr, III) | Academic Degrees | Institution | Location (city, state/province, country) | Role or Contribution, eg, chair, principal investigator | Group (if more than 1 Group listed in the byline) and/or Subgroup (eg, Steering Committee) |
|-----------------------------------|--------------|-----------------------|------------------|-------------|------------------------------------------|---------------------------------------------------------|--------------------------------------------------------------------------------------------|
| Migual A                          | Llaja Obispo |                       |                  |             |                                          |                                                         |                                                                                            |
| Monica                            | Lo Vecchio   |                       |                  |             |                                          |                                                         |                                                                                            |
| Valentina N                       | Lombardo     |                       |                  |             |                                          |                                                         |                                                                                            |
| Laura                             | Lombardo     |                       |                  |             |                                          |                                                         |                                                                                            |
| Andrea                            | Luciani      |                       |                  |             |                                          |                                                         |                                                                                            |
| Marianna                          | Macerelli    |                       |                  |             |                                          |                                                         |                                                                                            |
| Michele                           | Maffezzoli   |                       |                  |             |                                          |                                                         |                                                                                            |
| Francesca                         | Maines       |                       |                  |             |                                          |                                                         |                                                                                            |
| Brigida A                         | Maiorano     |                       |                  |             |                                          |                                                         |                                                                                            |
| Andrea                            | Malgeri      |                       |                  |             |                                          |                                                         |                                                                                            |
| Daniele                           | Marinelli    |                       |                  |             |                                          |                                                         |                                                                                            |
| Marco                             | Maruzzo      |                       |                  |             |                                          |                                                         |                                                                                            |
| Cristina                          | Masini       |                       |                  |             |                                          |                                                         |                                                                                            |
| Daiana                            | Massi        |                       |                  |             |                                          |                                                         |                                                                                            |
| Alessandro                        | Mastrososa   |                       |                  |             |                                          |                                                         |                                                                                            |
| Alvise                            | Mattana      |                       |                  |             |                                          |                                                         |                                                                                            |
| Manlio                            | Mencoboni    |                       |                  |             |                                          |                                                         |                                                                                            |
| Alessia                           | Mennitto     |                       |                  |             |                                          |                                                         |                                                                                            |
| Chiara                            | Mercinelli   |                       |                  |             |                                          |                                                         |                                                                                            |
| Carlo                             | Messina      |                       |                  |             |                                          |                                                         |                                                                                            |
| Marco                             | Messina      |                       |                  |             |                                          |                                                         |                                                                                            |
| Fortuna                           | Migliaccio   |                       |                  |             |                                          |                                                         |                                                                                            |
| Marco                             | Migliari     |                       |                  |             |                                          |                                                         |                                                                                            |
| Benedetta                         | Montagna     |                       |                  |             |                                          |                                                         |                                                                                            |
| Daniela                           | Montanari    |                       |                  |             |                                          |                                                         |                                                                                            |
| Anna M                            | Morelli      |                       |                  |             |                                          |                                                         |                                                                                            |
| Franco                            | Morelli      |                       |                  |             |                                          |                                                         |                                                                                            |
| Stefano                           | Moroso       |                       |                  |             |                                          |                                                         |                                                                                            |
| Alessandra                        | Mosca        |                       |                  |             |                                          |                                                         |                                                                                            |
| Claudia                           | Mucciarini   |                       |                  |             |                                          |                                                         |                                                                                            |
| Fernando M                        | Hernandez    |                       |                  |             |                                          |                                                         |                                                                                            |

## Supplemental Online Content: Nonauthor Collaborators

\*First name, last name, and suffix (if applicable) are required and will appear in PubMed.

| *First Name and Middle Initial(s) | *Last Name  | *Suffix (eg, Jr, III) | Academic Degrees | Institution | Location (city, state/province, country) | Role or Contribution, eg, chair, principal investigator | Group (if more than 1 Group listed in the byline) and/or Subgroup (eg, Steering Committee) |
|-----------------------------------|-------------|-----------------------|------------------|-------------|------------------------------------------|---------------------------------------------------------|--------------------------------------------------------------------------------------------|
| Viviana                           | Murgia      |                       |                  |             |                                          |                                                         |                                                                                            |
| Veronica                          | Murianni    |                       |                  |             |                                          |                                                         |                                                                                            |
| Maura                             | Murru       |                       |                  |             |                                          |                                                         |                                                                                            |
| Andrea                            | Muto        |                       |                  |             |                                          |                                                         |                                                                                            |
| Emanuele                          | Naglieri    |                       |                  |             |                                          |                                                         |                                                                                            |
| Cecilia                           | Nasso       |                       |                  |             |                                          |                                                         |                                                                                            |
| Maurizio                          | Nicodemo    |                       |                  |             |                                          |                                                         |                                                                                            |
| Franco                            | Nolè        |                       |                  |             |                                          |                                                         |                                                                                            |
| Valentina                         | Orlando     |                       |                  |             |                                          |                                                         |                                                                                            |
| Cinzia                            | Ortega      |                       |                  |             |                                          |                                                         |                                                                                            |
| Elisabetta                        | Paccagnella |                       |                  |             |                                          |                                                         |                                                                                            |
| Roberto                           | Pacelli     |                       |                  |             |                                          |                                                         |                                                                                            |
| Antonio                           | Palazzo     |                       |                  |             |                                          |                                                         |                                                                                            |
| Erica                             | Palesandro  |                       |                  |             |                                          |                                                         |                                                                                            |
| Francesco                         | Pantano     |                       |                  |             |                                          |                                                         |                                                                                            |
| Federico                          | Paolieri    |                       |                  |             |                                          |                                                         |                                                                                            |
| Maria N                           | Pappagallo  |                       |                  |             |                                          |                                                         |                                                                                            |
| Laura                             | Pappalardo  |                       |                  |             |                                          |                                                         |                                                                                            |
| Antonella                         | Pasqualini  |                       |                  |             |                                          |                                                         |                                                                                            |
| Rodolfo                           | Passalacqua |                       |                  |             |                                          |                                                         |                                                                                            |
| Anna                              | Passarelli  |                       |                  |             |                                          |                                                         |                                                                                            |
| Giovanna                          | Pecoraro    |                       |                  |             |                                          |                                                         |                                                                                            |
| Paolo                             | Pedrazzoli  |                       |                  |             |                                          |                                                         |                                                                                            |
| Giulia M                          | Pelin       |                       |                  |             |                                          |                                                         |                                                                                            |
| Antonio                           | Pellino     |                       |                  |             |                                          |                                                         |                                                                                            |
| Alessio                           | Pepe        |                       |                  |             |                                          |                                                         |                                                                                            |
| Marco                             | Perna       |                       |                  |             |                                          |                                                         |                                                                                            |
| Matteo                            | Perrino     |                       |                  |             |                                          |                                                         |                                                                                            |
| Francesco                         | Perrone     |                       |                  |             |                                          |                                                         |                                                                                            |
| Bruno                             | Perrucci    |                       |                  |             |                                          |                                                         |                                                                                            |
| Mara                              | Persano     |                       |                  |             |                                          |                                                         |                                                                                            |



## Supplemental Online Content: Nonauthor Collaborators

\*First name, last name, and suffix (if applicable) are required and will appear in PubMed.

| *First Name and Middle Initial(s) | *Last Name   | *Suffix (eg, Jr, III) | Academic Degrees | Institution | Location (city, state/province, country) | Role or Contribution, eg, chair, principal investigator | Group (if more than 1 Group listed in the byline and/or Subgroup (eg, Steering Committee)) |
|-----------------------------------|--------------|-----------------------|------------------|-------------|------------------------------------------|---------------------------------------------------------|--------------------------------------------------------------------------------------------|
| Alessandra                        | Piancastelli |                       |                  |             |                                          |                                                         |                                                                                            |
| Maria                             | Picciotto    |                       |                  |             |                                          |                                                         |                                                                                            |
| Francesco                         | Pierantoni   |                       |                  |             |                                          |                                                         |                                                                                            |
| Sandro                            | Pignata      |                       |                  |             |                                          |                                                         |                                                                                            |
| Brunella                          | Pilato       |                       |                  |             |                                          |                                                         |                                                                                            |
| Margherita                        | Piras        |                       |                  |             |                                          |                                                         |                                                                                            |
| Annagrazia                        | Pireddu      |                       |                  |             |                                          |                                                         |                                                                                            |
| Chiara                            | Pisano       |                       |                  |             |                                          |                                                         |                                                                                            |
| Carmela                           | Pisano       |                       |                  |             |                                          |                                                         |                                                                                            |
| Annamaria                         | Piscazzi     |                       |                  |             |                                          |                                                         |                                                                                            |
| Salvatore R                       | Pisconti     |                       |                  |             |                                          |                                                         |                                                                                            |
| Marco                             | Pisino       |                       |                  |             |                                          |                                                         |                                                                                            |
| Alessandra                        | Pitrè        |                       |                  |             |                                          |                                                         |                                                                                            |
| Maria L                           | Poeta        |                       |                  |             |                                          |                                                         |                                                                                            |
| Luca                              | Pompella     |                       |                  |             |                                          |                                                         |                                                                                            |
| Giulia                            | Poti         |                       |                  |             |                                          |                                                         |                                                                                            |
| Veronica                          | Prati        |                       |                  |             |                                          |                                                         |                                                                                            |
| Giuseppe                          | Procopio     |                       |                  |             |                                          |                                                         |                                                                                            |
| Livio                             | Puglia       |                       |                  |             |                                          |                                                         |                                                                                            |
| Giorgia                           | Razzini      |                       |                  |             |                                          |                                                         |                                                                                            |
| Sara E                            | Rebuzzi      |                       |                  |             |                                          |                                                         |                                                                                            |
| Federica                          | Recine       |                       |                  |             |                                          |                                                         |                                                                                            |
| Pasquale                          | Rescigno     |                       |                  |             |                                          |                                                         |                                                                                            |
| Dario                             | Ribera       |                       |                  |             |                                          |                                                         |                                                                                            |
| Riccardo                          | Ricotta      |                       |                  |             |                                          |                                                         |                                                                                            |
| Alessio                           | Rizzo        |                       |                  |             |                                          |                                                         |                                                                                            |
| Mimma                             | Rizzo        |                       |                  |             |                                          |                                                         |                                                                                            |
| Michela                           | Roberto      |                       |                  |             |                                          |                                                         |                                                                                            |
| Luisa                             | Rollo        |                       |                  |             |                                          |                                                         |                                                                                            |
| Sabrina                           | Rossetti     |                       |                  |             |                                          |                                                         |                                                                                            |
| Virginia                          | Rossi        |                       |                  |             |                                          |                                                         |                                                                                            |

## Supplemental Online Content: Nonauthor Collaborators

\*First name, last name, and suffix (if applicable) are required and will appear in PubMed.

| *First Name and Middle Initial(s) | *Last Name  | *Suffix (eg, Jr, III) | Academic Degrees | Institution | Location (city, state/province, country) | Role or Contribution, eg, chair, principal investigator | Group (if more than 1 Group listed in the byline) and/or Subgroup (eg, Steering Committee) |
|-----------------------------------|-------------|-----------------------|------------------|-------------|------------------------------------------|---------------------------------------------------------|--------------------------------------------------------------------------------------------|
| Ernesto                           | Rossi       |                       |                  |             |                                          |                                                         |                                                                                            |
| Lorena                            | Rossi       |                       |                  |             |                                          |                                                         |                                                                                            |
| Giovanni                          | Rosti       |                       |                  |             |                                          |                                                         |                                                                                            |
| Giandomenico                      | Roviello    |                       |                  |             |                                          |                                                         |                                                                                            |
| Elvio G                           | Russi       |                       |                  |             |                                          |                                                         |                                                                                            |
| Nello                             | Salesi      |                       |                  |             |                                          |                                                         |                                                                                            |
| Alessia                           | Salfi       |                       |                  |             |                                          |                                                         |                                                                                            |
| Enrico                            | Sammarco    |                       |                  |             |                                          |                                                         |                                                                                            |
| Francesca                         | Sanguedolce |                       |                  |             |                                          |                                                         |                                                                                            |
| Camilla                           | Sansi       |                       |                  |             |                                          |                                                         |                                                                                            |
| Fiorenza                          | Santamaria  |                       |                  |             |                                          |                                                         |                                                                                            |
| Daniele                           | Santini     |                       |                  |             |                                          |                                                         |                                                                                            |
| Matteo                            | Santoni     |                       |                  |             |                                          |                                                         |                                                                                            |
| Donata                            | Sartori     |                       |                  |             |                                          |                                                         |                                                                                            |
| Camilla                           | Sartragno   |                       |                  |             |                                          |                                                         |                                                                                            |
| Teodoro                           | Sava        |                       |                  |             |                                          |                                                         |                                                                                            |
| Andrea                            | Sbrana      |                       |                  |             |                                          |                                                         |                                                                                            |
| Sarah                             | Scagliarini |                       |                  |             |                                          |                                                         |                                                                                            |
| Stefania                          | Scala       |                       |                  |             |                                          |                                                         |                                                                                            |
| Giuseppa                          | Scandurra   |                       |                  |             |                                          |                                                         |                                                                                            |
| Daniela                           | Scattolin   |                       |                  |             |                                          |                                                         |                                                                                            |
| Giuseppe                          | Schepisi    |                       |                  |             |                                          |                                                         |                                                                                            |
| Clorinda                          | Schettino   |                       |                  |             |                                          |                                                         |                                                                                            |
| Giovanni                          | Schinzari   |                       |                  |             |                                          |                                                         |                                                                                            |
| Simona                            | Secondino   |                       |                  |             |                                          |                                                         |                                                                                            |
| Pierangela                        | Sepe        |                       |                  |             |                                          |                                                         |                                                                                            |
| Riccardo                          | Serra       |                       |                  |             |                                          |                                                         |                                                                                            |
| Alessio                           | Signori     |                       |                  |             |                                          |                                                         |                                                                                            |
| Giustino                          | Silvestro   |                       |                  |             |                                          |                                                         |                                                                                            |
| Zuzana                            | Sirotojà    |                       |                  |             |                                          |                                                         |                                                                                            |
| Mariella                          | Sorarù      |                       |                  |             |                                          |                                                         |                                                                                            |

## Supplemental Online Content: Nonauthor Collaborators

\*First name, last name, and suffix (if applicable) are required and will appear in PubMed.

| *First Name and Middle Initial(s) | *Last Name  | *Suffix (eg, Jr, III) | Academic Degrees | Institution | Location (city, state/province, country) | Role or Contribution, eg, chair, principal investigator | Group (if more than 1 Group listed in the byline) and/or Subgroup (eg, Steering Committee) |
|-----------------------------------|-------------|-----------------------|------------------|-------------|------------------------------------------|---------------------------------------------------------|--------------------------------------------------------------------------------------------|
| Hector                            | Soto Parra  |                       |                  |             |                                          |                                                         |                                                                                            |
| Gian P                            | Spinelli    |                       |                  |             |                                          |                                                         |                                                                                            |
| Marco                             | Stellato    |                       |                  |             |                                          |                                                         |                                                                                            |
| Luciano                           | Stumbo      |                       |                  |             |                                          |                                                         |                                                                                            |
| Pierosandro                       | Tagliaferri |                       |                  |             |                                          |                                                         |                                                                                            |
| Rosa                              | Tambaro     |                       |                  |             |                                          |                                                         |                                                                                            |
| Stefano                           | Tamberi     |                       |                  |             |                                          |                                                         |                                                                                            |
| Irene                             | Testi       |                       |                  |             |                                          |                                                         |                                                                                            |
| Ilaria                            | Toma        |                       |                  |             |                                          |                                                         |                                                                                            |
| Mirko                             | Tomasino    |                       |                  |             |                                          |                                                         |                                                                                            |
| Stefania                          | Tommasi     |                       |                  |             |                                          |                                                         |                                                                                            |
| Vincenzo                          | Tortora     |                       |                  |             |                                          |                                                         |                                                                                            |
| Anna                              | Tortorella  |                       |                  |             |                                          |                                                         |                                                                                            |
| ilaria                            | Toscani     |                       |                  |             |                                          |                                                         |                                                                                            |
| Paolo                             | Tralongo    |                       |                  |             |                                          |                                                         |                                                                                            |
| Renza                             | Triolo      |                       |                  |             |                                          |                                                         |                                                                                            |
| Marcello                          | Tucci       |                       |                  |             |                                          |                                                         |                                                                                            |
| Susanna                           | Urban       |                       |                  |             |                                          |                                                         |                                                                                            |
| Luca                              | Urso        |                       |                  |             |                                          |                                                         |                                                                                            |
| Anna A                            | Valsecchi   |                       |                  |             |                                          |                                                         |                                                                                            |
| Antonello                         | Veccia      |                       |                  |             |                                          |                                                         |                                                                                            |
| Chiara                            | Vela        |                       |                  |             |                                          |                                                         |                                                                                            |
| Jole                              | Ventriglia  |                       |                  |             |                                          |                                                         |                                                                                            |
| Antonio                           | Verde       |                       |                  |             |                                          |                                                         |                                                                                            |
| Elenza                            | Verzoni     |                       |                  |             |                                          |                                                         |                                                                                            |
| Francesca                         | Vignani     |                       |                  |             |                                          |                                                         |                                                                                            |
| Maria G                           | Vitale      |                       |                  |             |                                          |                                                         |                                                                                            |
| Isabella                          | Vittimberga |                       |                  |             |                                          |                                                         |                                                                                            |
| Francesca                         | Zacchi      |                       |                  |             |                                          |                                                         |                                                                                            |
| Giulia                            | Zago        |                       |                  |             |                                          |                                                         |                                                                                            |
| Vittorina                         | Zagonel     |                       |                  |             |                                          |                                                         |                                                                                            |

Supplemental Online Content: Nonauthor Collaborators

\*First name, last name, and suffix (if applicable) are required and will appear in PubMed.

| *First Name and Middle Initial(s) | *Last Name | *Suffix (eg, Jr, III) | Academic Degrees | Institution | Location (city, state/province, country) | Role or Contribution, eg, chair, principal investigator | Group (if more than 1 Group listed in the byline) and/or Subgroup (eg, Steering Committee) |
|-----------------------------------|------------|-----------------------|------------------|-------------|------------------------------------------|---------------------------------------------------------|--------------------------------------------------------------------------------------------|
| Elisa                             | Zanardi    |                       |                  |             |                                          |                                                         |                                                                                            |
| Diego                             | Zara       |                       |                  |             |                                          |                                                         |                                                                                            |
| Annalisa                          | Zeppellini |                       |                  |             |                                          |                                                         |                                                                                            |
| Antonia                           | Zonno      |                       |                  |             |                                          |                                                         |                                                                                            |
| Paola A                           | Zucali     |                       |                  |             |                                          |                                                         |                                                                                            |
| Lucrezia                          | Zumstein   |                       |                  |             |                                          |                                                         |                                                                                            |
