# Supplementary material for: Significance of PD-L1 in Metastatic Urothelial Carcinoma Treated With Immune Checkpoint Inhibitors: A Systematic Review and Meta-Analysis
Source: PubMed Central journal article supplement (PMC10918499; doi:10.1001/jamanetworkopen.2024.1215), 2024-03-06
Supplement: jamanetwopen-e241215-s003.pdf [file jamanetwopen-e241215-s003.pdf]

## Data Sharing Statement

Maiorano. Significance of PD-L1 in Metastatic Urothelial Carcinoma Treated With Immune Checkpoint Inhibitors. *JAMA Netw Open*. Published March 06, 2024.

doi:10.1001/jamanetworkopen.2024.1215

### Data

**Data available:** No

### Additional Information

**Explanation for why data not available:** We pooled data that are already available from the clinical trials that we cited in the manuscript
